# Supplementary material for: Human isotype‐dependent inhibitory antibody responses against Mycobacterium tuberculosis
Source: PubMed Central journal article supplement (PMC5090662; doi:10.15252/emmm.201606330), 2016-10-11
Supplement: EMMM-8-1325-s001.pdf [file EMMM-8-1325-s001.pdf]

## **Appendix**

### **Content:**

**Appendix Table S1:** TB patient information

**Appendix Table S2:** Ig gene features and antibody reactivity of plasmablast antibodies

**Appendix Table S3:** Ig gene features and antibody reactivity of antibodies generated from HBHA-reactive memory B cells

**Appendix Table S4:** Functional characterization of plasmablast antibodies

**Appendix Table S5:** Statistical analysis

**Appendix Figure S1:** Antigen-reactivity and concentration-dependent effect of monoclonal IgG and IgA antibodies on MTB infection of human lung epithelial cells.

Appendix Table S1: TB patient information

| Patients   |          |           | Sample    | Serum Ig                        |                                 |                                 | Plasmablasts |
|------------|----------|-----------|-----------|---------------------------------|---------------------------------|---------------------------------|--------------|
| TB         | Sex      | Age       | Timepoint | IgG<br>[AUC x10 <sup>-2</sup> ] | IgA<br>[AUC x10 <sup>-3</sup> ] | IgM<br>[AUC x10 <sup>-3</sup> ] | [%]          |
| <b>7*</b>  | <b>F</b> | <b>32</b> | <b>BT</b> | <b>1,3</b>                      | 0,6                             | <b>1,2</b>                      | <b>1,2</b>   |
| 14         | M        | 52        | AT (2 m)  | <b>1,7</b>                      | 0,5                             | <b>1,1</b>                      | 0,5          |
| 15         | F        | 33        | AT (2 m)  | 0,3                             | ND                              | ND                              | <b>0,8</b>   |
| 16         | M        | 50        | BT        | <b>1,0</b>                      | <b>1,0</b>                      | <b>1,1</b>                      | 0,6          |
| 17         | M        | 41        | BT        | <b>1,3</b>                      | <b>1,4</b>                      | <b>1,0</b>                      | 0,3          |
| 18         | M        | 68        | BT        | 0,2                             | 0,6                             | <b>1,1</b>                      | 0,0          |
| 19         | F        | 44        | BT        | <b>1,5</b>                      | ND                              | ND                              | 0,2          |
| 20         | F        | 58        | BT        | 0,5                             | 0,6                             | 0,8                             | 0,2          |
| 21         | M        | 55        | BT        | 0,7                             | ND                              | ND                              | <b>3,0</b>   |
| 22         | M        | 32        | AT (3 m)  | <b>1,3</b>                      | ND                              | ND                              | <b>2,5</b>   |
| 23         | M        | 52        | BT        | <b>1,4</b>                      | 0,3                             | 0,6                             | <b>3,1</b>   |
| <b>24*</b> | <b>F</b> | <b>61</b> | <b>BT</b> | <b>1,1</b>                      | 0,6                             | 0,7                             | <b>5,0</b>   |
| 25         | F        | 38        | BT        | 0,5                             | <b>1,0</b>                      | <b>1,1</b>                      | <b>4,7</b>   |
| 26         | F        | 65        | BT        | <b>1,2</b>                      | <b>0,7</b>                      | <b>1,1</b>                      | 0,1          |
| 29         | M        | 58        | AT (2 wk) | <b>1,1</b>                      | 0,5                             | 0,7                             | 0,6          |
| 30         | F        | 30        | BT        | <b>1,1</b>                      | <b>0,9</b>                      | 0,9                             | 0,1          |
| 31         | M        | 50        | AT (2 wk) | <b>1,1</b>                      | <b>0,8</b>                      | 0,9                             | <b>1,8</b>   |
| <b>33*</b> | <b>M</b> | <b>25</b> | <b>BT</b> | <b>1,1</b>                      | 0,5                             | 0,6                             | <b>6,5</b>   |
| 34         | F        | 27        | AT (2 m)  | 0,6                             | ND                              | ND                              | 0,1          |
| 35         | ?        | ?         | BT        | <b>1,2</b>                      | ND                              | ND                              | <b>1,0</b>   |
| 36         | M        | 31        | BT        | 0,6                             | ND                              | ND                              | <b>2,4</b>   |
| 37         | M        | 34        | AT (1 m)  | 0,7                             | ND                              | ND                              | 0,0          |
| 39         | M        | 15        | BT        | 0,5                             | <b>0,8</b>                      | <b>1,1</b>                      | 0,0          |
| 40         | M        | 17        | BT        | 0,4                             | 0,6                             | <b>1,0</b>                      | 0,6          |
| 41         | M        | 30        | AT ( wk)  | 0,6                             | ND                              | ND                              | ND           |

TB - Tuberculosis; \* - patient selected for mAb cloning; numbers in bold indicate + reactivity/PB population

BT - before treatment; AT - after treatment; m - months; w - weeks; Serum Ig - Ig serum reactivity to MTB whole cell lysate



| TB patient | Nr  | Isotype Heavy Chain | VH            | JH       | SHM | CDR3                 | Isotype Light Chain | VL           | JL       | SHM | MTB lysate | MTB bacteria | Cross-reactive | MTB Cell Membrane | ManLAM | BCG bacteria (FACS) | Esat-6 | Ag85B |
|------------|-----|---------------------|---------------|----------|-----|----------------------|---------------------|--------------|----------|-----|------------|--------------|----------------|-------------------|--------|---------------------|--------|-------|
| Pat TB33   | 003 | IgA1                | IGHV3-23*01   | IGHJ4*02 | 6   | GRYTYGYFFDY          | kappa               | IGKV3-20*01  | IGKJ3*01 | 1   | -          | -            | -              |                   |        |                     |        |       |
| Pat TB33   | 010 | IgA2                | IGHV1-2*02    | IGHJ4*02 | 26  | LPYITTSRDF           | kappa               | IGKV3-20*01  | IGKJ4*01 | 20  | +          | -            | +              |                   |        | -                   |        |       |
| Pat TB33   | 026 | IgA1                | IGHV3-7*01    | IGHJ4*02 | 26  | DPGWGAFDY            | kappa               | IGKV2-30*02  | IGKJ2*01 | 6   | -          | -            | -              |                   |        |                     |        |       |
| Pat TB33   | 032 | IgA1                | IGHV3-53*01   | IGHJ2*01 | 27  | LPLGDWYFDL           | lambda              | IGLV2-23*02  | IGLJ3*02 | 21  | -          | -            | -              |                   |        |                     |        |       |
| Pat TB33   | 033 | IgA1                | IGHV3-74*03   | IGHJ3*01 | 19  | SKLLADDAFDV          | kappa               | IGKV3-20*01  | IGKJ1*01 | 12  | -          | -            | -              |                   |        |                     |        |       |
| Pat TB33   | 052 | IgG1                | IGHV3-21*01   | IGHJ3*01 | 30  | HILGVPGAFHV          | kappa               | IGKV1-NL1*01 | IGKJ2*01 | 15  | +          | +            | -              | -                 |        | -                   |        |       |
| Pat TB33   | 055 | IgG2                | IGHV3-30-3*01 | IGHJ4*02 | 30  | RGPFITGRYDFYGEYYFDS  | kappa               | IGKV1-5*03   | IGKJ1*01 | 14  | -          | -            | -              |                   |        |                     |        |       |
| Pat TB33   | 057 | IgG1                | IGHV3-9*01    | IGHJ4*02 | 32  | VSYSSGWYLDH          | kappa               | IGKV1-27*01  | IGKJ2*01 | 18  | -          | -            | -              |                   |        |                     |        |       |
| Pat TB33   | 059 | IgA2                | IGHV4-39*07   | IGHJ4*02 | 16  | YAKYSSTSYPGAFDY      | lambda              | IGLV2-11*01  | IGLJ3*02 | 5   | +          | -            | -              |                   |        | -                   |        |       |
| Pat TB33   | 064 | IgG1                | IGHV3-21*01   | IGHJ4*02 | 15  | DGRDGYNLNY           | lambda              | IGLV6-57*01  | IGLJ3*02 | 6   | -          | -            | -              |                   |        |                     |        |       |
| Pat TB33   | 066 | IgA1                | IGHV3-7*01    | IGHJ5*02 | 20  | DRTLAA               | kappa               | IGKV3D-15*01 | IGKJ2*01 | 8   | -          | -            | -              |                   |        |                     |        |       |
| Pat TB33   | 091 | IgA2                | IGHV3-21*01   | IGHJ4*02 | 13  | DPPHDYGNNAEDY        | kappa               | IGKV1-39*01  | IGKJ1*01 | 12  | -          | -            | +              |                   |        |                     |        |       |
| Pat TB33   | 093 | IgA2                | IGHV5-51*01   | IGHJ3*01 | 30  | IGAGDSSADAFDV        | lambda              | IGLV1-47*01  | IGLJ1*01 | 28  | +          | -            | -              | -                 |        | -                   |        |       |
| Pat TB33   | 103 | IgG1                | IGHV3-74*01   | IGHJ4*02 | 26  | ESYRRFDD             | lambda              | IGLV2-8*01   | IGLJ1*01 | 3   | -          | -            | -              |                   |        |                     |        |       |
| Pat TB33   | 114 | IgA1                | IGHV3-11*01   | IGHJ6*02 | 13  | EPGMERMDV            | kappa               | IGKV1-16*02  | IGKJ2*01 | 9   | -          | -            | -              |                   |        |                     |        |       |
| Pat TB33   | 115 | IgA1                | IGHV1-3*01    | IGHJ3*02 | 26  | TRPYDVLSSLDDAFDL     | kappa               | IGKV1-39*01  | IGKJ4*01 | 23  | -          | -            | -              |                   |        |                     |        |       |
| Pat TB33   | 117 | IgA2                | IGHV3-15*01   | IGHJ4*02 | 21  | SAAAGLPDC            | lambda              | IGLV1-51*01  | IGLJ3*02 | 8   | +          | -            | +              |                   |        |                     |        |       |
| Pat TB33   | 123 | IgA1                | IGHV3-48*02   | IGHJ5*02 | 29  | VGNSAAPDW            | lambda              | IGLV3-27*01  | IGLJ3*02 | 9   | -          | -            | -              |                   | +      |                     |        |       |
| Pat TB33   | 126 | IgG2                | IGHV3-21*01   | IGHJ4*02 | 24  | DILGASRGFDY          | kappa               | IGKV3-11*01  | IGKJ4*01 | 8   | -          | -            | -              |                   |        |                     |        |       |
| Pat TB33   | 127 | IgA1                | IGHV7-4-1*02  | IGHJ5*02 | 36  | WSCSSGNCYLGH         | kappa               | IGKV3-20*01  | IGKJ4*01 | 13  | -          | -            | -              |                   |        |                     |        |       |
| Pat TB33   | 129 | IgA2                | IGHV4-39*07   | IGHJ6*02 | 9   | RGSGFNGMDV           | kappa               | IGKV3-20*01  | IGKJ2*01 | 3   | +          | -            | -              | -                 |        | -                   |        |       |
| Pat TB33   | 137 | IgA2                | IGHV4-59*01   | IGHJ4*02 | 10  | EPSWSGYFDY           | kappa               | IGKV3-20*01  | IGKJ1*01 | 7   | -          | -            | -              |                   |        |                     |        |       |
| Pat TB33   | 138 | IgA2                | IGHV3-30*18   | IGHJ6*02 | 18  | DFIVLDYDEHYGMDV      | lambda              | IGLV1-44*01  | IGLJ3*02 | 25  | -          | +            | -              |                   |        |                     |        |       |
| Pat TB33   | 141 | IgG1                | IGHV4-31*03   | IGHJ4*02 | 17  | GDWNDVHVDF           | lambda              | IGLV1-40*01  | IGLJ1*01 | 9   | -          | -            | -              |                   |        |                     |        |       |
| Pat TB33   | 146 | IgG2                | IGHV4-39*01   | IGHJ5*02 | 25  | GLYNSDWLDP           | lambda              | IGLV1-51*01  | IGLJ3*02 | 15  | -          | -            | -              |                   |        |                     |        |       |
| Pat TB33   | 148 | IgA2                | IGHV3-73*02   | IGHJ4*02 | 22  | RIPNVNDF             | lambda              | IGLV2-14*01  | IGLJ3*02 | 13  | +          | +            | +              |                   |        |                     |        |       |
| Pat TB33   | 152 | IgG2                | IGHV1-2*02    | IGHJ5*02 | 9   | ELGSTGGHWFDP         | kappa               | IGKV3-20*01  | IGKJ1*01 | 6   | -          | -            | -              |                   |        |                     |        |       |
| Pat TB33   | 161 | IgA2                | IGHV4-39*02   | IGHJ4*02 | 36  | DYGFRTDC             | kappa               | IGKV1-39*01  | IGKJ2*04 | 15  | -          | -            | -              |                   |        |                     |        |       |
| Pat TB33   | 180 | IgG2                | IGHV4-39*01   | IGHJ4*02 |     | HRSGSSDFDF           | lambda              | IGLV2-14*01  | IGLJ3*02 | 22  | -          | -            | -              |                   |        |                     |        |       |
| Pat TB33   | 189 | IgA1                | IGHV3-23*01   | IGHJ5*02 | 30  | ICPSQNNWFDA          | kappa               | IGKV3-11*01  | IGKJ5*01 | 8   | +          | -            | -              |                   |        | -                   |        |       |
| Pat TB33   | 204 | IgA1                | IGHV4-39*07   | IGHJ4*02 | 32  | VLRGADYVDY           | lambda              | IGLV2-8*01   | IGLJ3*02 | 9   | -          | -            | +              |                   |        |                     |        |       |
| Pat TB33   | 247 | IgA1                | IGHV3-23*05   | IGHJ4*02 | 34  | EGYCSGGHCRYFDS       | kappa               | IGKV3-11*01  | IGKJ5*01 | 20  | -          | -            | -              |                   |        |                     |        |       |
| Pat TB33   | 302 | IgG2                | IGHV3-30-3*01 | IGHJ3*02 | 19  | DNDVFQKGNAFDL        | lambda              | IGLV2-14*01  | IGLJ1*01 | 17  | -          | -            | -              |                   |        |                     |        |       |
| Pat TB33   | 319 | IgA1                | IGHV3-21*01   | IGHJ4*02 | 8   | QLQGFYD              | lambda              | IGLV1-44*01  | IGLJ3*02 | 6   | -          | -            | +              |                   |        |                     |        |       |
| PatTB24    | 001 | IgA1                | IGHV1-3*01    | IGHJ6*02 | 30  | ENLRGDYGMVDV         | lambda              | IGLV2-23*02  | IGLJ1*01 | 13  | -          | +            | -              |                   |        | -                   |        | -     |
| PatTB24    | 009 | IgG1                | IGHV4-39*01   | IGHJ3*02 | 0   | SPRGYSYGLGAFDI       | kappa               | IGKV3-20*01  | IGKJ4*01 | 0   | +          | -            | +              |                   | -      |                     | +      | +     |
| PatTB24    | 017 | IgA2                | IGHV3-23*04   | IGHJ4*02 | 5   | VVGTIDPFDF           | lambda              | IGLV2-14*01  | IGLJ2*01 | 2   | -          | -            | -              |                   |        | -                   |        | -     |
| PatTB24    | 023 | IgG1                | IGHV3-7*01    | IGHJ4*02 | 16  | DPIRSDGHNYDY         | kappa               | IGKV1-12*01  | IGKJ5*01 | 19  | -          | +            | -              | -                 | -      | -                   | -      | -     |
| PatTB24    | 026 | IgA2                | IGHV3-30*07   | IGHJ6*02 | 23  | GPICITNGDCYSYYYYGLDV | lambda              | IGLV2-14*01  | IGLJ3*02 | 13  | -          | -            | -              | -                 |        | -                   |        | -     |
| PatTB24    | 037 | IgA1                | IGHV3-53*01   | IGHJ4*02 | 39  | RNFHY                | lambda              | IGLV7-46*01  | IGLJ2*01 | 13  | -          | -            | -              | -                 | +      | +                   | -      | -     |
| PatTB24    | 039 | IgA2                | IGHV3-15*01   | IGHJ5*01 | 19  | GSVEGS               | lambda              | IGLV7-43*01  | IGLJ2*01 | 5   | -          | -            | -              | -                 |        | -                   | +      | -     |
| PatTB24    | 053 | IgA2                | IGHV3-33*01   | IGHJ4*02 | 11  | GARKSSGFLHDY         | kappa               | IGKV1D-33*01 | IGKJ3*01 | 1   | -          | +            | -              |                   |        | -                   |        | -     |
| PatTB24    | 054 | IgA1                | IGHV1-46*01   | IGHJ4*02 | 29  | TIFDFWSGYSFDS        | lambda              | IGLV9-49*01  | IGLJ2*01 | 12  | +          | +            | -              | +                 |        | +                   | +      | -     |

| TB patient | Nr  | Isotype Heavy Chain | VH          | JH       | SHM | CDR3                | Isotype Light Chain | VL          | JL       | SHM | MTB lysate | MTB bacteria | Cross-reactive | MTB Cell Membrane | ManLAM | BCG bacteria (FACS) | Esat-6 | Ag85B |
|------------|-----|---------------------|-------------|----------|-----|---------------------|---------------------|-------------|----------|-----|------------|--------------|----------------|-------------------|--------|---------------------|--------|-------|
| PatTB24    | 055 | IgA2                | IGHV1-8*01  | IGHJ5*02 | 21  | VSWLTSSHNWFD        | kappa               | IGKV1-39*01 | IGKJ5*01 | 22  | -          | -            | -              | -                 | -      | -                   | -      | -     |
| PatTB24    | 066 | IgA1                | IGHV3-9*01  | IGHJ3*02 | 15  | DLGYYDSGSYAFDI      | kappa               | IGKV3-20*01 | IGKJ1*01 | 4   | -          | -            | -              | -                 | -      | -                   | -      | -     |
| PatTB24    | 067 | IgA1                | IGHV3-30*19 | ND       | 17  | DGNNNNYEFYYR        | lambda              | IGLV3-21*02 | IGLJ1*01 | 5   | -          | -            | -              | -                 | -      | -                   | -      | -     |
| PatTB24    | 071 | IgA2                | IGHV3-15*01 | IGHJ4*02 | 11  | PSAGRTVTLDY         | kappa               | IGKV2-28*01 | IGKJ2*01 | 3   | -          | -            | -              | -                 | -      | -                   | -      | -     |
| PatTB24    | 073 | IgA1                | IGHV3-23*04 | IGHJ4*02 | 26  | VNWIRDRDS           | kappa               | IGKV1-5*03  | IGKJ1*01 | 10  | +          | -            | -              | +                 | -      | -                   | -      | -     |
| PatTB24    | 077 | IgG1                | IGHV4-34*01 | IGHJ6*02 | 4   | ARVTLYPGVRGAYHYGMDV | kappa               | IGKV1-17*01 | IGKJ1*01 | 3   | -          | -            | +              | -                 | -      | -                   | +      | +     |
| PatTB24    | 102 | IgA2                | IGHV4-4*07  | IGHJ4*02 | 12  | NWNWGFDS            | lambda              | IGLV2-8*01  | IGLJ1*01 | 8   | -          | -            | -              | -                 | -      | -                   | -      | -     |
| PatTB24    | 107 | IgG4                | IGHV3-33*01 | IGHJ6*02 | 8   | DGIYDFWSGYYPNNGMDV  | lambda              | IGLV1-40*01 | IGLJ2*01 | 3   | -          | +            | -              | -                 | -      | -                   | -      | -     |
| PatTB24    | 115 | IgA2                | IGHV3-23*04 | IGHJ3*01 | 24  | REITVTFWTFDV        | lambda              | IGLV2-14*01 | IGLJ1*01 | 6   | -          | -            | -              | -                 | -      | -                   | -      | -     |
| PatTB24    | 133 | IgA1                | IGHV3-11*01 | IGHJ4*02 | 21  | DIKSPGDFLYFDY       | lambda              | IGLV1-51*02 | IGLJ3*02 | 4   | -          | -            | -              | -                 | -      | -                   | -      | -     |
| PatTB24    | 159 | IgG2                | IGHV1-2*02  | IGHJ4*02 | 29  | DTYGGDSFDY          | lambda              | IGLV2-11*01 | IGLJ1*01 | 13  | -          | -            | -              | -                 | -      | -                   | -      | -     |
| PatTB24    | 170 | IgA1                | IGHV3-72*01 | IGHJ5*02 | 24  | SDHYDTNGP           | kappa               | IGKV1-16*02 | IGKJ4*01 | 7   | +          | -            | -              | -                 | -      | -                   | -      | -     |
| PatTB24    | 176 | IgA2                | IGHV4-39*01 | IGHJ4*02 | 21  | SRARAPCDY           | kappa               | IGKV3-20*01 | IGKJ2*01 | 14  | +          | -            | -              | +                 | -      | -                   | -      | -     |
| PatTB24    | 185 | IgA2                | IGHV4-39*01 | IGHJ6*02 | 13  | HPWNLFDFTGYSGMDV    | lambda              | IGLV1-47*01 | IGLJ2*01 | 7   | -          | +            | -              | -                 | -      | +                   | -      | -     |
| PatTB24    | 196 | IgG1                | IGHV3-30*10 | IGHJ4*02 | 32  | EEWVVPNYFDY         | kappa               | IGKV1-39*01 | IGKJ2*02 | 19  | +          | -            | -              | +                 | -      | -                   | -      | -     |
| PatTB24    | 204 | IgA2                | IGHV3-64*05 | IGHJ4*02 | 19  | DGGAYNFPY           | lambda              | IGLV7-43*01 | IGLJ3*02 | 11  | -          | +            | -              | -                 | -      | -                   | -      | -     |
| PatTB24    | 210 | IgA2                | IGHV3-53*01 | IGHJ4*02 | 32  | VKSLAGPYFES         | kappa               | IGKV3-11*01 | IGKJ1*01 | 11  | +          | +            | -              | +                 | -      | -                   | -      | -     |
| PatTB24    | 213 | IgA1                | IGHV3-72*01 | IGHJ3*02 | 20  | GYSGVSIYAADI        | kappa               | IGKV3-20*01 | IGKJ1*01 | 12  | -          | -            | -              | -                 | -      | -                   | -      | -     |
| PatTB24    | 215 | IgA2                | IGHV3-64*05 | IGHJ4*02 | 22  | WYGDYTY             | kappa               | IGKV3-20*01 | IGKJ4*01 | 8   | -          | -            | -              | -                 | -      | -                   | -      | -     |
| PatTB24    | 218 | IgA1                | IGHV1-3*01  | IGHJ4*02 | 19  | GGNYHSSGYCLDY       | lambda              | IGLV3-25*02 | IGLJ2*01 | 10  | +          | +            | -              | +                 | -      | -                   | -      | -     |
| PatTB24    | 223 | IgA1                | IGHV3-43*01 | IGHJ5*02 | 30  | EAEQWLFNP           | kappa               | IGKV3-15*01 | IGKJ1*01 | 5   | +          | -            | +              | +                 | -      | +                   | +      | +     |
| PatTB24    | 236 | IgA2                | IGHV1-58*01 | IGHJ6*02 | 14  | PFSTPPPWNFGLDV      | lambda              | IGLV1-47*01 | IGLJ3*02 | 10  | -          | -            | -              | -                 | -      | -                   | -      | -     |
| PatTB24    | 245 | IgG1                | IGHV3-9*01  | IGHJ4*02 | 6   | ALAQRQYLVLDY        | lambda              | IGLV1-47*01 | IGLJ1*01 | 3   | -          | -            | -              | -                 | -      | -                   | -      | -     |
| PatTB24    | 260 | IgG2                | IGHV4-59*08 | IGHJ4*02 | 4   | LGDYSDY             | kappa               | IGKV3-11*01 | IGKJ2*02 | 1   | -          | -            | -              | -                 | -      | -                   | -      | -     |
| PatTB24    | 272 | IgA2                | IGHV4-59*01 | IGHJ4*02 | 25  | APVDHYDSSGNHYGGDS   | kappa               | IGKV3-20*01 | IGKJ1*01 | 17  | -          | -            | -              | -                 | -      | -                   | -      | -     |
| PatTB24    | 275 | IgG3                | IGHV1-46*03 | IGHJ6*02 | 24  | PGGTYGMD            | kappa               | IGKV1-39*01 | IGKJ2*01 | 15  | -          | -            | -              | -                 | -      | -                   | -      | -     |
| PatTB24    | 286 | IgA2                | IGHV3-23*04 | IGHJ4*02 | 17  | DRGDFWRGYCFDS       | kappa               | IGKV1-5*03  | IGKJ1*01 | 6   | +          | -            | -              | +                 | -      | -                   | -      | -     |
| PatTB24    | 337 | IgA1                | IGHV3-23*04 | IGHJ4*02 | 18  | RGTQYGSSRPFDY       | kappa               | IGKV1-39*01 | IGKJ4*01 | 9   | +          | -            | -              | -                 | -      | -                   | -      | -     |

SHM, somatic hypermutations; VH, variable segment heavy chain; JH, joining segment heavy chain; VL, variable segment light chain; JL, joining segment light chain; ND, not determined; -, non-reactive; + reactive

**Appendix Table S3:** Ig gene features and antibody reactivity of all expressed HBHA-reactive memory B cells from TB patients and HCWs.

| Donor  | Antibody Name | VH            | JH       | CDR3                   | SHM | isotype | VL           | JL       | CDR3          | SHM | Reactivity to HBHA | Cross-reactive | Neutralization | Enhancement |
|--------|---------------|---------------|----------|------------------------|-----|---------|--------------|----------|---------------|-----|--------------------|----------------|----------------|-------------|
| HCW001 | HD001HBMem095 | IGHV4-31*03   | IGHJ4*02 | AGSSTS YGRFDY          | 6   | IgHM    | IGKV1-12*02  | IGKJ3*01 | QQANSFPLFT    | 9   | +                  | -              | +              | +           |
| HCW001 | HD001HBMem122 | IGHV5-51*01   | IGHJ5*02 | YSGPSLYSNWFDP          | 12  | IgHA1   | IGLV1-44*01  | IGLJ2*01 | AAWDDSLNGPI   | 22  | -                  | -              | -              | -           |
| HCW001 | HD001HBMem164 | IGHV4-30-2*01 | IGHJ4*02 | GPYGS GTVLSLEY         | 7   | IgHA1   | IGLV2-8*01   | IGLJ2*01 | SSYAGSNNLVV   | 2   | -                  | -              | -              | -           |
| HCW001 | HD001HBMem216 | IGHV3-23*01   | IGHJ2*01 | AKDPSPRRRWQLRHLGWYFDL  | 19  | IgHA1   | IGKV2D-29*02 | IGKJ1*01 | MQSIEFLT      | 12  | +                  | +              | -              | -           |
| HCW001 | HD001HBMem238 | IGHV3-74*03   | IGHJ3*02 | GGIGAFDF               | 15  | IgHA1   | IGLV2-8*02   | IGLJ2*01 | SSYAGSNNFV    | 7   | -                  | -              | -              | -           |
| HCW001 | HD001HBMem270 | IGHV3-30*04   | IGHJ4*02 | GPRYS SSGWYSNYFDY      | 20  | IgHG2   | IGLV2-23*02  | IGLJ2*01 | CSYAGNSVLL    | 10  | -                  | -              | -              | -           |
| HCW001 | HD001HBMem351 | IGHV3-23*01   | IGHJ3*02 | AKPRMITMVRGDAFDI       | 10  | IgHA1   | IGKV1-27*01  | IGKJ1*01 | QKYNSAPHT     | 9   | +                  | +              | -              | -           |
| HCW001 | HD001HBMem352 | IGHV3-23*04   | IGHJ5*02 | AKGGDSGTYYFDW          | 13  | IgHA1   | IGKV1-5*03   | IGKJ1*01 | QQYNSYYRT     | 2   | -                  | -              | -              | -           |
| HCW001 | HD001HBMem773 | IGHV1-18*01   | IGHJ6*03 | VRAPRPDY YFYMDV        | 36  | IgHA1   | IGLV1-47*01  | IGLJ2*01 | AGWDDILKCPV   | 23  | +                  | +              | +              | -           |
| HCW001 | HD001HBMem785 | IGHV3-23*01   | IGHJ5*01 | AKMEVNGDYEYWFDS        | 19  | IgHG2   | IGKV4-1*01   | IGKJ1*01 | QQYYKSWT      | 9   | -                  | -              | -              | -           |
| HCW001 | HD001HBMem797 | IGHV3-74*03   | IGHJ6*03 | AKPAVASAYGRPLHYHMDV    | 18  | IgHA1   | IGKV4-1*01   | IGKJ5*01 | QQCYSTPPT     | 10  | -                  | -              | -              | -           |
| HCW001 | HD001HBMem804 | IGHV2-5*02    | IGHJ5*02 | GYSKQGNSYSGSGSYHS      | 14  | ND      | IGKV3-11*01  | IGKJ1*01 | QQRSSWSE S    | 12  | +                  | -              | +              | -           |
| HCW001 | HD001HBMem823 | IGHV3-74*03   | IGHJ4*02 | VRDRDWIVGDY            | 19  | ND      | IGLV1-47*01  | IGLJ3*02 | ATWDDSLGGWV   | 9   | -                  | -              | -              | -           |
| HCW001 | HD001HBMem825 | IGHV5-10-1*03 | IGHJ4*02 | LLRGYYDSNAYPYFDN       | 14  | ND      | IGKV4-1*01   | IGKJ4*01 | QLYYNPPLT     | 4   | -                  | -              | -              | -           |
| HCW001 | HD001HBMem830 | IGHV4-59*01   | IGHJ6*02 | AKFEGLGEYYYGMDV        | 13  | IgHA2   | IGLV8-61*01  | IGLJ3*02 | VLYMGSGIWV    | 3   | -                  | -              | -              | -           |
| HCW001 | HD001HBMem835 | IGHV1-2*02    | IGHJ4*02 | TRAHN NAYYFDS          | 9   | IgHA1   | IGLV2-8*02   | IGLJ2*01 | ATWDDSLGGWV   | 2   | -                  | -              | -              | -           |
| HCW001 | HD001HBMem838 | IGHV4-39*01   | IGHJ5*02 | VHFYPMVRGAMPDWFDP      | 17  | IgHA1   | IGKV3-15*01  | IGKJ2*01 | QQYNSWPPMYS   | 10  | -                  | -              | -              | -           |
| HCW001 | HD001HBMem841 | IGHV5-51*01   | IGHJ4*02 | HLYSGSGSESDY           | 0   | ND      | IGKV1-39*01  | IGKJ2*02 | QQSYSTLT      | 2   | -                  | -              | -              | -           |
| HCW001 | HD001HBMem847 | IGHV3-7*03    | IGHJ4*02 | DRAVSRWSEVPDY          | 9   | ND      | IGKV1-5*03   | IGKJ1*01 | QQYSTYSRT     | 4   | -                  | -              | -              | -           |
| HCW001 | HD001HBMem848 | IGHV1-18*04   | IGHJ4*02 | DYSGSGRGDY             | 9   | IgHA1   | IGKV3-20*01  | IGKJ3*01 | QQYGN SPPFT   | 5   | -                  | -              | -              | -           |
| HCW001 | HD001HBMem854 | IGHV3-21*01   | IGHJ4*02 | VRLVSRAAGFDY           | 17  | IgHA1   | IGKV1-27*01  | IGKJ2*02 | QKYNSAPYT     | 7   | -                  | -              | -              | -           |
| HCW001 | HD001HBMem857 | IGHV3-47*01   | IGHJ4*02 | AKWIGGN YFGVDY         | 11  | IGHM    | IGLV7-43*01  | IGLJ3*02 | LLYYGGSEPWL   | 6   | +                  | -              | +              | +           |
| HCW001 | HD001HBMem862 | IGHV3-7*02    | IGHJ4*02 | SGTPTS GYGGVVYAQKFDY   | 17  | IgHA2   | IGKV1-39*01  | IGKJ3*01 | QQIYTTRFT     | 17  | -                  | -              | -              | -           |
| HCW001 | HD001HBMem864 | IGHV3-15*01   | IGHJ6*02 | TTPFRYYYSGKNYYYGMDV    | 2   | IgHG1   | IGKV3-11*01  | IGKJ4*01 | QQRSNWPPLT    | 1   | +                  | -              | -              | -           |
| HCW001 | HD001HBMem867 | IGHV3-53*01   | IGHJ4*02 | AHYDSSGWFD S           | 4   | IgHA1   | IGKV1-39*01  | IGKJ4*01 | QQSYSTLTVLT   | 2   | -                  | -              | -              | -           |
| HCW001 | HD001HBMem871 | IGHV2-5*01    | IGHJ3*02 | AHSGDILTGYYNVAPFDI     | 4   | IgHA2   | IGLV1-44*01  | IGLJ2*01 | AAWDDSLNGP VV | 6   | -                  | -              | -              | -           |
| HCW001 | HD001HBMem872 | IGHV3-53*01   | IGHJ4*02 | AETPSGSYYGFDY          | 18  | IgHA1   | IGKV1-39*01  | IGKJ4*01 | QQSYR TPLT    | 7   | -                  | -              | -              | -           |
| HCW001 | HD001HBMem873 | IGHV3-23*01   | IGHJ3*01 | AKDIDDSYGHRRD GWIDAFDV | 16  | IgHA1   | IGKV3-15*01  | IGKJ5*01 | QQYNDWPPIT    | 7   | -                  | -              | -              | -           |
| HCW001 | HD001HBMem880 | IGHV1-2*02    | IGHJ4*02 | AVDHGRNSRGFDY          | 13  | ND      | IGLV8-61*01  | IGLJ3*02 | VLYMGSGIWV    | 4   | -                  | -              | -              | -           |
| HCW001 | HD001HBMem885 | IGHV4-59*01   | IGHJ4*02 | VIVGGTHDY              | 35  | IgHA1   | IGKV1-17*01  | IGKJ3*01 | LHHNSDFFT     | 12  | -                  | -              | -              | -           |
| HCW001 | HD001HBMem887 | IGHV4-4*02    | IGHJ3*02 | DHSYGGDSVWAFDL         | 24  | ND      | IGKV3-20*01  | IGKJ1*01 | QHYHDSSWT     | 14  | +                  | -              | +              | +           |
| HCW001 | HD001HBMem889 | IGHV5-10-1*03 | IGHJ2*01 | QRTGGTQY YWYFDL        | 12  | IgHA1   | IGLV2-23*02  | IGLJ3*02 | CSYAGSTTLV V  | 3   | -                  | -              | -              | -           |
| HCW001 | HD001HBMem899 | IGHV3-23*01   | IGHJ4*02 | ATVLLFRGPGFLFDY        | 22  | IgHA1   | IGKV1-13*02  | IGKJ4*01 | QHFNGYPPT     | 7   | -                  | -              | -              | -           |
| HCW001 | HD001HBMem914 | IGHV1-69*01   | IGHJ2*01 | SLPKTTVTY YWYFDL       | 3   | ND      | IGKV3-20*01  | IGKJ2*02 | QQYGSSPQT     | 0   | -                  | -              | -              | -           |

| Donor  | Antibody Name | VH            | JH       | CDR3                  | SHM | Isotype | VL           | JL       | CDR3        | SHM | Reactivity to HBHA | Cross-reactive | Neutralization | Enhancement |
|--------|---------------|---------------|----------|-----------------------|-----|---------|--------------|----------|-------------|-----|--------------------|----------------|----------------|-------------|
| HCW001 | HD001HBMem915 | IGHV4-61*01   | IGHJ4*02 | GPGNYDLLTGYYPAELDY    | 10  | IgHA1   | IGLV2-8*02   | IGLJ2*01 | SSYAGSKNVV  | 3   | -                  | -              |                |             |
| HCW001 | HD001HBMem919 | IGHV1-46*01   | IGHJ6*02 | SMNSGSYYFRYYYYGMDV    | 3   | IgHA1   | IGLV1-44*01  | IGLJ2*01 | AAWDDSLNGHV | 0   | +                  | +              |                |             |
| HCW001 | HD001HBMem926 | IGHV4-30-4*01 | IGHJ4*02 | AKAVTIFPVFYFDY        | 0   | IgHA1   | IGLV1-44*01  | IGLJ2*01 | AAWDDSLNGHV | 1   | -                  | -              |                |             |
| HCW002 | T2PBMHA004    | IGHV4-59*01   | IGHJ1*01 | DGDTSVTYFHH           | 19  | IGHM    | IGKV3-20*01  | IGKJ2*03 | QQYGNSPPY   | 5   | -                  | -              |                |             |
| HCW002 | T2PBMHA007    | IGHV2-5*02    | IGHJ4*02 | RLGGYGWNAHFDY         | 12  | IGHM    | IGLV2-8*01   | IGLJ1*01 | SSNAGGSTYV  | 1   | -                  | -              |                |             |
| HCW002 | T2PBMHA014    | IGHV3-48*03   | IGHJ4*02 | VLGLEY                | 9   | IGHM    | IGKV3-11*01  | IGKJ2*02 | QQRSNWPRT   | 14  | -                  | -              |                |             |
| HCW002 | T2PBMHA019    | IGHV2-5*06    | IGHJ4*02 | TFYYDGRAEYARYSWFDP    | 11  | ND      | IGKV3-20*01  | IGKJ2*01 | QQYGDSPNT   | 5   | +                  | -              |                |             |
| HCW002 | T2PBMHA036    | IGHV2-5*02    | IGHJ4*02 | RQFLNADWNFGYFDY       | 13  | ND      | IGLV2-14*01  | IGLJ3*02 | SSYTGSSV    | 7   | +                  | -              |                |             |
| HCW002 | T2PBMHA056    | IGHV4-38-2*02 | IGHJ6*03 | DTPRAHTSTGGLVASRNWFDP | 15  | IGHM    | IGLV1-51*01  | IGLJ2*01 | GTWDSSLSTGV | 5   | -                  | -              |                |             |
| HCW002 | T2PBMHA059    | IGHV4-39*07   | IGHJ5*02 | TRAPVVVVTVYYYYMDV     | 8   | IGHA2   | IGLV7-46*01  | IGLJ1*01 | LLSYSGAGV   | 4   | -                  | -              |                |             |
| HCW002 | T2PBMHA060    | IGHV2-5*02    | IGHJ5*02 | HRGPTGVDR             | 21  | IGHM    | IGKV3-20*01  | IGKJ5*01 | QQYGRSPIT   | 19  | -                  | -              |                |             |
| HCW002 | T2PBMHA061    | IGHV1-46*01   | IGHJ4*02 | RLMYSGNWDVGFDP        | 28  | IGHA2   | IGLV7-43*01  | IGLJ3*02 | LLFSGGVVW   | 14  | -                  | -              |                |             |
| HCW002 | T2PBMHA065    | IGHV2-5*02    | IGHJ4*02 | YDRSSWYFRDY           | 13  | IGHM    | IGLV2-14*01  | IGLJ1*01 | SSYTSSTV    | 4   | -                  | -              |                |             |
| HCW002 | T2PBMHA072    | IGHV3-7*03    | IGHJ4*03 | GRRDGYSYRGDDAFHI      | 13  | ND      | IGKV2-30*01  | IGKJ2*01 | MLTHWPYT    | 6   | -                  | -              |                |             |
| HCW002 | T2PBMHA082    | IGHV2-5*02    | IGHJ4*02 | DRGEWLDAFDP           | 17  | IGHM    | IGLV2-8*01   | IGLJ1*01 | SSYAGSNTYV  | 2   | -                  | -              |                |             |
| HCW002 | T2PBMHA109    | IGHV4-31*03   | IGHJ3*01 | GEGFPGMGAFDV          | 20  | IGHA2   | IGKV1-13*02  | IGKJ2*01 | QHFNSFLYT   | 22  | -                  | -              |                |             |
| HCW002 | T2PBMHA116    | IGHV1-46*01   | IGHJ4*02 | DLPGGYQGNLFDY         | 10  | IGHA2   | IGKV3-20*01  | IGKJ5*01 | QQYGSSPIT   | 6   | -                  | -              |                |             |
| HCW002 | T2PBMHA128    | IGHV2-5*02    | IGHJ4*02 | DRGGDYDSSSYFDS        | 13  | IGHM    | IGKV1-12*01  | IGKJ5*01 | QQAYRFPT    | 9   | +                  | -              | +              |             |
| HCW002 | T2PBMHA134    | IGHV3-21*01   | IGHJ6*04 | PGIGVFMDV             | 20  | IGHA1   | IGKV3-20*01  | IGKJ2*01 | LLYINNSHRYT | 11  | -                  | -              |                |             |
| HCW002 | T2PBMHA138    | IGHV2-5*02    | IGHJ4*02 | PGIGVFMDV             | 9   | IGHM    | IGKV1-5*03   | IGKJ1*01 | QQCYSYST    | 11  | -                  | -              |                |             |
| HCW002 | T2PBMHA139    | IGHV4-39*07   | IGHJ4*02 | RLVGGGSNWDANFDH       | 17  | IGHA1   | IGKV1-16*01  | IGKJ1*01 | QQYYSYPR    | 7   | -                  | -              |                |             |
| HCW002 | T2PBMHA142    | IGHV2-5*02    | IGHJ4*02 | GMRYHGGD              | 14  | IGHM    | IGLV2-8*01   | IGLJ1*01 | SSYAGSNTYV  | 2   | -                  | -              |                |             |
| HCW002 | T2PBMHA162    | IGHV2-5*02    | IGHJ5*02 | RLESGSPGWWWYFDH       | 6   | ND      | IGKV3-20*01  | IGKJ5*01 | QQYGSSPST   | 12  | -                  | -              |                |             |
| HCW002 | T2PBMHA164    | IGHV1-3*01    | IGHJ4*03 | RLTYSGNWDVGFDP        | 25  | IGHM    | IGKV4-1*01   | IGKJ4*01 | QQYYSAPLT   | 13  | -                  | -              |                |             |
| HCW002 | T2PBMHA167    | IGHV5-51*01   | IGHJ4*02 | PRNAAIPQGWYFDC        | 12  | IGHM    | IGKV1-5*03   | IGKJ2*02 | QQYNTYSQT   | 12  | -                  | -              |                |             |
| HCW002 | T2PBMHA175    | IGHV3-74*03   | IGHJ3*02 | PRNAAIPQGWYFDC        | 19  | IGHA2   | IGKV1-39*01  | IGKJ3*01 | QQTYGTPFT   | 9   | +                  | -              |                |             |
| HCW002 | T2PBMHA181    | IGHV1-18*04   | IGHJ6*02 | SGGSGPILDY            | 34  | IGHA1   | IGKV3-20*01  | IGKJ3*01 | QQYGSSTFT   | 15  | -                  | -              |                |             |
| HCW002 | T2PBMHA184    | IGHV4-34*01   | IGHJ4*02 | ALIDEGHGLGY           | 28  | IGHA2   | IGKV1-5*01   | IGKJ2*01 | HQYSDYPYT   | 16  | -                  | -              |                |             |
| TB029  | TB29PBMHA004  | IGHV3-7*03    | IGHJ3*02 | GDYYDSSGYFHDAFDI      | 10  | IGHM    | IGKV3-15*01  | IGKJ1*01 | QQYNNWPPWT  | 11  | -                  | -              |                |             |
| TB029  | TB29PBMHA006  | IGHV1-3*01    | IGHJ6*02 | AIVSTINDYYYGMDV       | 16  | IGHM    | IGKV1-27*01  | IGKJ3*01 | QKYNAPLT    | 6   | -                  | -              |                |             |
| TB029  | TB29PBMHA009  | IGHV3-33*01   | IGHJ4*02 | VKPGVEYFFDY           | 4   | IGHM    | IGKV1D-33*01 | IGKJ4*01 | QQYDNLPLT   | 0   | -                  | -              |                |             |
| TB029  | TB29PBMHA012  | IGHV3-21*01   | IGHJ4*02 | NFYGYDDNSGSTRKRFYFHY  | 20  | IGHA2   | IGLV1-51*01  | IGLJ2*01 | ATWDGSLSVL  | 7   | -                  | -              |                |             |
| TB029  | TB29PBMHA012  | IGHV3-21*01   | IGHJ4*02 | NFYGYDDNSGSTRKRFYFHY  | 20  | IGHA2   | IGLV1-51*01  | IGLJ2*01 | ATWDGSLSVL  | 7   | -                  | -              |                |             |
| TB029  | TB29PBMHA015  | IGHV3-33*01   | IGHJ4*02 | DREGGYSYSGFFDY        | 1   | IGHM    | IGKV1-5*03   | IGKJ1*01 | QQYNSYPWT   | 3   | -                  | -              |                |             |
| TB029  | TB29PBMHA023  | IGHV3-23*01   | IGHJ4*02 | DGRNYGRFDY            | 10  | IGHA2   | IGKV3-11*01  | IGKJ3*01 | QQWSNWPLT   | 6   | +                  | +              | -              |             |

| Donor | Antibody Name | VH            | JH       | CDR3                       | SHM | Isotype | VL           | JL       | CDR3        | SHM | Reactivity to HBHA | Cross-reactive | Neutralization | Enhancement |
|-------|---------------|---------------|----------|----------------------------|-----|---------|--------------|----------|-------------|-----|--------------------|----------------|----------------|-------------|
| TB029 | TB29PBMHA025  | IGHV3-74*03   | IGHJ4*02 | STTGIFDY                   | 24  | IGHA2   | IGKV2D-40*01 | IGKJ1*01 | MQRRESPST   | 11  | -                  | -              |                |             |
| TB029 | TB29PBMHA026  | IGHV1-69*06   | IGHJ4*02 | QMGATGFDY                  | 23  | IGHA2   | IGKV2-28*01  | IGKJ4*01 | MEALQTPH    | 9   | -                  | -              |                |             |
| TB029 | TB29PBMHA036  | IGHV1-46*02   | IGHJ5*02 | DPRPYQRFNYFDP              | 36  | IGHA1   | IGLV1-44*01  | IGLJ3*02 | ASWDDSLRGLV | 9   | -                  | -              |                |             |
| TB029 | TB29PBMHA038  | IGHV3-48*03   | IGHJ4*02 | TGILTGLDY                  | 28  | IGHA2   | IGLV1-44*01  | IGLJ2*01 | AAWDDSLNGRL | 7   | -                  | -              |                |             |
| TB029 | TB29PBMHA046  | IGHV1-46*01   | IGHJ4*02 | RSGTYWGFYD                 | 27  | IGHA1   | IGKV3-20*01  | IGKJ1*01 | QQYASSTWT   | 11  | +                  | +              |                |             |
| TB029 | TB29PBMHA053  | IGHV3-30*18   | IGHJ5*02 | DPRARAGLYCSSTSCYSGTQNNWFDP | 0   | IGHM    | IGKV1-39*01  | IGKJ2*01 | QQSYSTPYT   | 0   | -                  | -              |                |             |
| TB029 | TB29PBMHA060  | IGHV4-4*02    | IGHJ3*02 | DSPVRAIECSGGPCDVALDI       | 16  | IGHA1   | IGKV3-11*01  | IGKJ1*01 | QQRNWPRPT   | 7   | -                  | -              |                |             |
| TB029 | TB29PBMHA062  | IGHV3-23*01   | IGHJ4*02 | ASKGCSGGSCYSVQNYFDY        | 7   | IGHA2   | IGLV2-14*01  | IGLJ3*02 | SSYTNSVTLV  | 7   | -                  | -              |                |             |
| TB029 | TB29PBMHA064  | IGHV3-53*01   | IGHJ4*02 | GSPNSNEHFYLN               | 32  | IGHA1   | IGKV1-39*01  | IGKJ1*01 | QQTITPWT    | 20  | -                  | -              |                |             |
| TB029 | TB29PBMHA066  | IGHV3-48*03   | IGHJ4*02 | EWKDDSY                    | 17  | IGHA2   | IGKV3-20*01  | IGKJ4*02 | QHYGTSPRLT  | 5   | -                  | -              |                |             |
| TB029 | TB29PBMHA071  | IGHV3-30-3*01 | IGHJ6*02 | DHPLYSSSSYYGMDV            | 21  | IGHA2   | IGKV1-16*01  | IGKJ4*01 | PWTYYGH     | 21  | -                  | -              |                |             |
| TB029 | TB29PBMHA088  | IGHV4-31*03   | IGHJ3*02 | EVINAADSDGFDM              | 17  | IGHA1   | IGKV3-15*01  | IGKJ4*01 | QHYTEQPLT   | 5   | -                  | -              |                |             |
| TB029 | TB29PBMHA090  | IGHV4-34*01   | IGHJ6*01 | AYCGGDCFMRDYYYYYGVDV       | 42  | IGHA1   | IGLV3-9*01   | IGLJ2*01 | QVWDMSVGM   | 19  | -                  | -              |                |             |
| TB029 | TB29PBMHA092  | IGHV4-59*02   | IGHJ4*02 | GRDAYKTGY                  | 25  | IGHM    | IGKV4-1*01   | IGKJ1*01 | QQYANTPWT   | 10  | -                  | -              |                |             |
| TB029 | TB29PBMHA098  | IGHV4-4*02    | IGHJ4*02 | AYCGGDCYLDS                | 18  | ND      | IGKV2-28*01  | IGKJ5*01 | MQLTQTTWA   | 6   | -                  | -              |                |             |
| TB029 | TB29PBMHA102  | IGHV3-30*18   | IGHJ3*02 | GHFYDSREYSFREQRAPDI        | 5   | IGHA1   | IGKV4-1*01   | IGKJ1*01 | QYHTTPT     | 4   | -                  | -              |                |             |
| TB029 | TB29PBMHA103  | IGHV3-23*01   | IGHJ1*01 | SGCSSTSCLAEIFQH            | 4   | IGHM    | IGKV1D-33*01 | IGKJ4*01 | QQYDNLPT    | 0   | -                  | -              |                |             |
| TB029 | TB29PBMHA120  | IGHV3-23*01   | IGHJ4*02 | DPNWDDGH                   | 35  | IGHA2   | IGKV2-30*01  | IGKJ2*02 | MQASYWPLT   | 20  | -                  | -              |                |             |
| TB029 | TB29PBMHA122  | IGHV3-48*03   | IGHJ3*02 | DRDGGKSSIHAFDI             | 15  | IGHM    | IGKV1-27*01  | IGKJ3*01 | QKYDSAPRT   | 2   | +                  | +              |                |             |
| TB029 | TB29PBMHA135  | IGHV3-7*01    | IGHJ4*02 | YNDGWWSGHY                 | 19  | IGHA2   | IGKV2-30*01  | IGKJ1*01 | MQASHWPPT   | 3   | -                  | -              |                |             |
| TB029 | TB29PBMHA136  | IGHV1-3*01    | IGHJ6*02 | RQVLFYGLDV                 | 32  | IGHA2   | IGLV3-25*02  | IGLJ3*02 | QSADNTASLWV | 20  | -                  | -              |                |             |
| TB029 | TB29PBMHA139  | IGHV1-58*01   | IGHJ5*02 | SGILTGSSNSDS               | 34  | IGHA2   | IGKV3-20*01  | IGKJ2*01 | LQYHTSPYT   | 16  | -                  | -              |                |             |
| TB029 | TB29PBMHA147  | IGHV2-5*02    | IGHJ4*02 | RVHLGFWSSAYFDY             | 2   | IGHM    | IGKV4-1*01   | IGKJ1*01 | QQYTTTPT    | 4   | -                  | -              |                |             |
| TB029 | TB29PBMHA163  | IGHV3-20*01   | IGHJ4*02 | LGPRTYDILTGPFYD            | 24  | IGHG3   | IGKV1D-33*01 | IGKJ4*01 | QQFDNLPLT   | 17  | +                  | -              | +              |             |
| TB029 | TB29PBMHA175  | IGHV3-7*03    | IGHJ4*02 | DVG YFDWSDY                | 7   | IGHM    | IGLV4-69*02  | IGLJ3*02 | QTWGTGIRV   | 7   | -                  | -              |                |             |
| TB029 | TB29PBMHA178  | IGHV3-7*01    | IGHJ5*02 | SAGWVSDS                   | 23  | IGHA2   | IGKV3-20*01  | IGKJ4*01 | HQSATSPLT   | 17  | -                  | -              |                |             |
| TB030 | TB030HBMem002 | IGHV3-66*01   | IGHJ4*02 | SGGGYYDSSGYYPFDY           | 7   | IgHM    | IGKV2-29*02  | IGKJ1*01 | MQGI YSWT   | 3   | -                  | -              |                |             |
| TB030 | TB030HBMem008 | IGHV3-74*01   | IGHJ5*02 | DPHGSGSA                   | 3   | IgHM    | IGLV2-14*01  | IGLJ3*02 | SSYTSSSTWM  | 3   | -                  | -              |                |             |
| TB030 | TB030HBMem012 | IGHV3-23*01   | IGHJ4*02 | AKGSMAPYYFDY               | 21  | IgHM    | IGKV3-20*01  | IGKJ1*01 | QQYGSSRT    | 5   | -                  | -              |                |             |
| TB030 | TB030HBMem025 | IGHV4-34*01   | IGHJ6*02 | RDPAVFRGMDV                | 0   | IgHM    | IGLV1-44*01  | IGLJ2*01 | AAWDDSLNGPI | 28  | -                  | -              |                |             |
| TB030 | TB030HBMem043 | IGHV3-30-3*01 | IGHJ4*02 | DKTTYDINSPIGY              | 12  | IgHM    | IGLV8-61*01  | IGLJ3*02 | VLYMGSGIWW  | 6   | -                  | -              |                |             |
| TB030 | TB030HBMem070 | IGHV3-9*01    | IGHJ1*01 | AKDRYSPRYFQH               | 0   | ND      | IGLV8-61*01  | IGLJ3*02 | VLYMGSGIWW  | 11  | -                  | -              |                |             |
| TB030 | TB030HBMem077 | IGHV4-39*01   | IGHJ6*02 | QRHNYEVYYGMDV              | 2   | IgHM    | IGKV1-39*01  | IGKJ4*01 | QQSYSTSLT   | 0   | -                  | -              |                |             |
| TB030 | TB030HBMem094 | IGHV3-53*04   | IGHJ6*02 | YGILSYGMDV                 | 2   | IgHM    | IGLV2-8*01   | IGLJ2*01 | SSYAGSNNFV  | 2   | -                  | -              |                |             |
| TB030 | TB030HBMem168 | IGHV3-30*18   | IGHJ6*02 | DFFSAAGTFHYFYGMDV          | 5   | IgHM    | IGLV1-47*02  | IGLJ3*02 | AAWDDSLSGVV | 5   | -                  | -              |                |             |



| Donor | Antibody Name | VH            | JH       | CDR3                   | SHM | Isotype | VL           | JL       | CDR3         | SHM | Reactivity to HBHA | Cross-reactive | Neutralization | Enhancement |
|-------|---------------|---------------|----------|------------------------|-----|---------|--------------|----------|--------------|-----|--------------------|----------------|----------------|-------------|
| TB030 | TB030HBMem244 | IGHV4-4*02    | IGHJ4*02 | GAVPRKKYFDY            | 14  | IgHA1   | IGKV1-9*01   | IGKJ3*01 | QQVYNYPFT    | 7   | -                  | -              |                |             |
| TB030 | TB030HBMem391 | IGHV3-20*01   | IGHJ3*02 | VRGRDYNLLHVFDI         | 7   | ND      | IGKV3-20*01  | IGKJ1*01 | QQSGSSPAT    | 4   | -                  | -              |                |             |
| TB030 | TB030HBMem410 | IGHV3-9*01    | IGHJ4*02 | AKDYCSSSSCYFDY         | 5   | ND      | IGKV3-20*01  | IGKJ5*01 | QQYGNPPIIT   | 5   | -                  | -              |                |             |
| TB030 | TB030HBMem418 | IGHV3-23*01   | IGHJ4*02 | VKEEPTVNAGYFDY         | 24  | IgHA1   | IGKV1D-12*01 | IGKJ4*01 | QQANSFPLT    |     | -                  | -              |                |             |
| TB030 | TB030HBMem421 | IGHV3-74*01   | IGHJ5*02 | GIGDDH                 | 8   | IgHG2   | IGLV4-69*01  | IGLJ2*01 | QTWGSGIQV    | 10  | -                  | -              |                |             |
| TB030 | TB030HBMem452 | IGHV4-59*01   | IGHJ4*02 | GKSSSTLSYFDY           | 14  | IgHG1   | IGKV1-5*03   | IGKJ1*01 | QQYNDYPGT    |     | -                  | -              |                |             |
| TB030 | TB030HBMem453 | IGHV5-51*01   | IGHJ3*02 | PMETHMLSAFDM           | 7   | ND      | IGLV8-61*01  | IGLJ3*02 | VLYMGSGIWW   | 3   | -                  | -              |                |             |
| TB030 | TB030HBMem462 | IGHV3-30-3*01 | IGHJ6*02 | VVRGYSYGFAYYYGMDV      | 4   | ND      | IGLV2-14*040 | IGLJ2*01 | SSYTSSSTLVV  | 0   | -                  | -              |                | -           |
| TB030 | TB030HBMem466 | IGHV4-39*01   | IGHJ4*02 | RFLYDSGSGRFDSD         | 18  | ND      | IGLV8-61*01  | IGLJ3*02 | VLYMGSGIWW   | 1   | -                  | -              |                |             |
| TB030 | TB030HBMem470 | IGHV1-18*01   | IGHJ3*02 | GPYYEEAFGDADFID        | 0   | ND      | IGKV2-30*02  | IGKJ4*01 | MQGTHWPPLT   |     | -                  | -              |                |             |
| TB030 | TB030HBMem471 | IGHV1-2*04    | IGHJ4*02 | QAGSGPSFDY             | 14  | ND      | IGLV2-23*03  | IGLJ2*01 | CSYVGSSTSVV  | 4   | -                  | -              |                |             |
| TB035 | TB035HBMem015 | IGHV3-23*01   | IGHJ4*02 | AKDELEYQHSYFDY         | 0   | IgHM    | IGKV1-5*03   | IGKJ5*01 | QQYNSYLIT    | 0   | -                  | -              |                |             |
| TB035 | TB035HBMem017 | IGHV4-59*01   | IGHJ6*02 | SRDHWKYVKDWAYFGLDV     | 35  | IgHM    | IGKV3-20*01  | IGKJ2*01 | QQYGDSQYT    | 27  | -                  | -              |                |             |
| TB035 | TB035HBMem020 | IGHV2-5*02    | IGHJ3*02 | AHIMITFGGVMRTDAFDI     | 26  | ND      | IGLV2-11*01  | IGLJ3*02 | CSYAGSYSWV   | 8   | +                  | -              | +              | -           |
| TB035 | TB035HBMem022 | IGHV3-64*02   | IGHJ4*02 | AYYYDSRGGHYLDS         | 11  | IgHM    | IGKV1-39*01  | IGKJ4*02 | QQTYTSS      | 13  | -                  | -              |                |             |
| TB035 | TB035HBMem042 | IGHV3-74*01   | IGHJ4*02 | DRPHRRLLDS             | 27  | IgHG2   | IGKV1-33*01  | IGKJ4*01 | LHHDNFPLT    | 12  | +                  | -              |                | -           |
| TB035 | TB035HBMem071 | IGHV4-39*01   | IGHJ6*02 | AEGGYSGNVHQHYYYGVVDV   | 2   | IgHM    | IGKV3-11*01  | IGKJ4*01 | QQRNNWPLT    | 1   | -                  | -              |                |             |
| TB035 | TB035HBMem080 | IGHV3-23*01   | IGHJ6*02 | VKTGGDCCWQSEYAMDV      | 20  | IgHA1   | IGKV4-1*01   | IGKJ5*01 | QQYYTTPIT    | 11  | +                  | -              |                | +           |
| TB035 | TB035HBMem094 | IGHV4-59*01   | IGHJ5*02 | DVEGDGYSQFDR           | 22  | IgHM    | IGKV3-20*01  | IGKJ2*01 | QQYGSSSYT    | 11  | -                  | -              |                |             |
| TB035 | TB035HBMem125 | IGHV3-15*01   | IGHJ4*02 | NTVYTPVDQAFDY          | 16  | IgHG2   | IGKV3-15*01  | IGKJ2*01 | QQYNNWPPYT   | 6   | -                  | -              |                |             |
| TB035 | TB035HBMem155 | IGHV3-74*03   | IGHJ6*02 | VRDRIEVESVRPIIYYGMDV   | 25  | IgHG2   | IGLV3-9*01   | IGLJ2*01 | QVWDSIVI     | 9   | -                  | -              |                |             |
| TB035 | TB035HBMem159 | IGHV2-5*02    | IGHJ4*02 | AHRAVRITWSRPFYFDY      | 3   | ND      | IGKV1-33*01  | IGKJ5*01 | QQSNNLPPT    | 5   | -                  | -              |                |             |
| TB035 | TB035HBMem183 | IGHV4-59*01   | IGHJ4*02 | GDVWGTD                | 6   | ND      | IGKV4-1*01   | IGKJ5*01 | QQYYSTPTIT   | 5   | -                  | -              |                |             |
| TB035 | TB035HBMem247 | IGHV4-59*01   | IGHJ6*02 | GGANYDAMDV             | 16  | IgHG1   | IGKV1-5*03   | IGKJ1*01 | QQYNTYRT     | 4   | -                  | -              |                |             |
| TB035 | TB035HBMem248 | IGHV3-30*18   | IGHJ6*02 | AKEKEWLGRHYYYGMDV      | 20  | IgHG1   | IGLV2-14*03  | IGLJ2*01 | SSYTSSSALA   | 13  | +                  | +              |                |             |
| TB035 | TB035HBMem255 | IGHV3-23*04   | IGHJ6*02 | GYDFLSGQPYAMEV         | 15  | IgHA1   | IGLV2-11*03  | IGLJ1*01 | CSYAGKFSYV   | 10  | -                  | -              |                |             |
| TB035 | TB035HBMem424 | IGHV3-30*03   | IGHJ4*02 | PDSDWYALALFGF          | 21  | IgHG2   | IGLV2-11*03  | IGLJ3*02 | CSYAGAFSTL   | 8   | -                  | -              |                |             |
| TB035 | TB035HBMem447 | IGHV3-7*01    | IGHJ6*02 | DRRQLVLGGYYYGMDV       | 4   | IgHA1   | IGLV1-40*01  | IGLJ2*01 | QSHDLGLSGSVV | 3   | +                  | +              |                |             |
| TB035 | TB035HBMem457 | IGHV3-72*01   | IGHJ4*02 | DFSVVGAIDYFDS          | 20  | IgHA2   | IGLV3-1*01   | IGLJ2*01 | QAWERDVT     | 9   | -                  | -              |                |             |
| TB035 | TB035HBMem465 | IGHV4-59*01   | IGHJ6*02 | SLRFFDWLSTHPDYHYYYGMGV | 4   | IgHA1   | IGLV2-14*04  | IGLJ2*01 | SSYSSSTLVV   | 6   | -                  | -              |                |             |
| TB035 | TB035HBMem467 | IGHV3-9*01    | IGHJ4*02 | AKGPSQRYFDWLSPFYFDY    | 7   | ND      | IGLV2-14*01  | IGLJ2*01 | SSYTSSSIHVV  | 2   | -                  | -              |                |             |
| TB035 | TB035HBMem469 | IGHV3-49*03   | IGHJ2*01 | TRKLLGHLYWYFDL         | 12  | IgHG1   | IGKV1-12*01  | IGKJ1*01 | QQANSFPPT    | 12  | +                  | +              |                | -           |
| TB035 | TB035HBMem470 | IGHV3-74*01   | IGHJ5*02 | DLGIDSSAS              | 4   | ND      | IGLV3-1*01   | IGLJ2*01 | QAWDSRMTV    | 0   | -                  | -              |                |             |
| TB035 | TB035HBMem516 | IGHV3-72*01   | IGHJ4*02 | VRAPYSATYFDY           | 16  | ND      | IGKV1-39*01  | IGKJ4*01 | QQSYSIP      | 10  | -                  | -              |                |             |
| TB035 | TB035HBMem557 | IGHV1-46*01   | IGHJ6*02 | AIWFAGQGSYISGSNVKDV    | 13  | IgHG1   | IGLV2-11*01  | IGLJ2*01 | CSYAGSYTWI   | 4   | +                  | +              |                |             |
| TB035 | TB035HBMem561 | IGHV3-11*06   | IGHJ5*02 | VRGGVVVADTR            | 19  | IgHA1   | IGLV3-21*03  | IGLJ2*01 | QVWDTNTDLGV  | 11  | -                  | -              |                |             |
| TB035 | TB035HBMem578 | IGHV3-30*18   | IGHJ6*02 | AKVFYTRSGSPGLFYGMDV    | 10  | IgHG1   | IGKV3-20*01  | IGKJ2*01 | QHYGSSPPYT   | 10  | +                  | +              |                | -           |
| TB035 | TB035HBMem584 | IGHV4-39*01   | IGHJ4*02 | PGREDGNSIAIDY          | 2   | IgHG2   | IGLV1-40*01  | IGLJ2*01 | QSYDSSLSSVV  | 2   | -                  | -              |                |             |
| TB035 | TB035HBMem586 | IGHV4-39*01   | IGHJ5*01 | SYDS                   | 7   | IgHA2   | IGLV1-44*01  | IGLJ1*01 | AAWDDSLNGYV  | 2   | -                  | -              |                |             |
| TB035 | TB035HBMem608 | IGHV3-64*02   | IGHJ4*02 | DRGLHFLED              | 12  | ND      | IGLV2-14*01  | IGLJ2*01 | SSRTSSSTLAGV | 6   | -                  | -              |                |             |

SHM, somatic hypermutations; VH, variable segment heavy chain; JH, joining segment heavy chain; VL, variable segment light chain; JL, joining segment light chain; ND, not determined; -, non-reactive; + reactive

**Appendix Table S4.** Functional characterization of plasmablast antibodies.

| Isotype | Subclass | TB patient | Antibody Nr | VH          |          |     |                    | SHM    | CDR3         | Isotype Light Chain | VL |    |     | SHM | Mtb lysate | MTB bacteria | Cross-reactive | Cell Membrane | ManLAM | FACS BCG | Neutralization | Enhancement |
|---------|----------|------------|-------------|-------------|----------|-----|--------------------|--------|--------------|---------------------|----|----|-----|-----|------------|--------------|----------------|---------------|--------|----------|----------------|-------------|
|         |          |            |             | VH          | JH       | SHM | CDR3               |        |              |                     | VL | JL | SHM |     |            |              |                |               |        |          |                |             |
| IgA     | IgA1     | Pat TB24   | 037         | IGHV3-53*01 | IGHJ4*02 | 39  | RNFHY              | lambda | IGLV7-46*01  | IGLJ2*01            | 13 | -  | -   | -   | -          | +            | +              | +             | -      |          |                |             |
| IgA     | IgA1     | Pat TB24   | 054         | IGHV1-46*01 | IGHJ4*02 | 29  | TIFDFWSGYSFDS      | lambda | IGLV9-49*01  | IGLJ2*01            | 12 | +  | +   | -   | +          | ND           | +              | -             | +      |          |                |             |
| IgA     | IgA1     | Pat TB24   | 073         | IGHV3-23*04 | IGHJ4*02 | 26  | VNWIRDRDS          | kappa  | IGKV1-5*03   | IGKJ1*01            | 10 | +  | -   | -   | +          | -            | -              | -             | -      |          |                |             |
| IgA     | IgA1     | Pat TB24   | 170         | IGHV3-72*01 | IGHJ5*02 | 24  | SDHYDTNGP          | kappa  | IGKV1-16*02  | IGKJ4*01            | 7  | +  | -   | -   | -          | ND           | -              | ND            | +      |          |                |             |
| IgA     | IgA1     | Pat TB24   | 218         | IGHV1-3*01  | IGHJ4*02 | 19  | GGNYHHSSGYCLDY     | lambda | IGLV3-25*02  | IGLJ2*01            | 10 | +  | +   | -   | +          | -            | -              | +             | +      |          |                |             |
| IgA     | IgA1     | Pat TB24   | 337         | IGHV3-23*04 | IGHJ4*02 | 18  | RGTQYGSSRPFDY      | kappa  | IGKV1-39*01  | IGKJ4*01            | 9  | +  | -   | -   | ND         | ND           | -              | -             | ND     |          |                |             |
| IgA     | IgA1     | Pat TB33   | 189         | IGHV3-23*01 | IGHJ5*02 | 30  | ICPSQNWNFDA        | kappa  | IGKV3-11*01  | IGKJ5*01            | 8  | +  | -   | -   | ND         | ND           | -              | +             | ND     |          |                |             |
| IgA     | IgA2     | Pat TB 7   | 066         | IGHV3-15*07 | IGHJ6*03 | 2   | DNMDV              | lambda | IGLV4-69*01  | IGLJ3*02            | 8  | +  | -   | -   | -          | ND           | -              | +             | ND     |          |                |             |
| IgA     | IgA2     | Pat TB24   | 039         | IGHV3-15*01 | IGHJ5*01 | 19  | GSVEGS             | lambda | IGLV7-43*01  | IGLJ2*01            | 5  | -  | -   | -   | -          | ND           | -              | +             | ND     |          |                |             |
| IgA     | IgA2     | Pat TB24   | 176         | IGHV4-39*01 | IGHJ4*02 | 21  | SRARAPCDY          | kappa  | IGKV3-20*01  | IGKJ2*01            | 14 | +  | -   | -   | +          | ND           | -              | ND            | +      |          |                |             |
| IgA     | IgA2     | Pat TB24   | 185         | IGHV4-39*01 | IGHJ6*02 | 13  | HPWNLFDFTGYYSGMDV  | lambda | IGLV1-47*01  | IGLJ2*01            | 7  | -  | +   | -   | ND         | -            | +              | ND            | -      |          |                |             |
| IgA     | IgA2     | Pat TB24   | 210         | IGHV3-53*01 | IGHJ4*02 | 32  | VKSLAGPYFES        | kappa  | IGKV3-11*01  | IGKJ1*01            | 11 | +  | +   | -   | +          | -            | -              | -             | +      |          |                |             |
| IgA     | IgA2     | Pat TB24   | 286         | IGHV3-23*04 | IGHJ4*02 | 17  | DRGDFWRGYCFDS      | kappa  | IGKV1-5*03   | IGKJ1*01            | 6  | +  | -   | -   | +          | -            | -              | -             | +      |          |                |             |
| IgA     | IgA2     | Pat TB33   | 059         | IGHV4-39*07 | IGHJ4*02 | 16  | YAKYSSTSYGAFDY     | lambda | IGLV2-11*01  | IGLJ3*02            | 5  | +  | -   | -   | ND         | ND           | -              | -             | -      |          |                |             |
| IgA     | IgA2     | Pat TB33   | 129         | IGHV4-39*07 | IGHJ6*02 | 9   | RGSGFNGMDV         | kappa  | IGKV3-20*01  | IGKJ2*01            | 3  | +  | -   | -   | -          | ND           | -              | +             | +      |          |                |             |
| IgA     | IgA2     | Pat TB33   | 148         | IGHV3-73*02 | IGHJ4*02 | 22  | RIPNVNDF           | lambda | IGLV2-14*01  | IGLJ3*02            | 13 | +  | +   | +   | ND         | ND           | ND             | +             | ND     |          |                |             |
| IgG     | IgG1     | Pat TB 7   | 017         | IGHV1-69*01 | IGHJ4*02 | 20  | TAFGVVGLDFDY       | lambda | IGLV7-46*01  | IGLJ2*01            | 9  | +  | +   | -   | ND         | ND           | ND             | ND            | +      |          |                |             |
| IgG     | IgG1     | Pat TB 7   | 023         | IGHV1-8*01  | IGHJ4*02 | 20  | VEWYRPFDF          | kappa  | IGKV3-20*01  | IGKJ4*01            | 9  | +  | -   | +   | +          | -            | -              | ND            | +      |          |                |             |
| IgG     | IgG1     | Pat TB 7   | 031         | IGHV3-15*07 | IGHJ4*02 | 17  | GFQGRGGWFRHITQY    | kappa  | IGKV1D-33*01 | IGKJ3*01            | 8  | +  | +   | +   | ND         | ND           | +              | ND            | +      |          |                |             |
| IgG     | IgG1     | Pat TB 7   | 034         | IGHV4-59*08 | IGHJ4*02 | 24  | RYGGYYFDH          | kappa  | IGKV1D-12*01 | IGKJ2*01            | 9  | +  | -   | -   | +          | ND           | -              | ND            | -      |          |                |             |
| IgG     | IgG1     | Pat TB 7   | 067         | IGHV3-21*01 | IGHJ6*03 | 1   | DNLPNRYMDV         | lambda | IGLV1-51*02  | IGLJ3*02            | 11 | +  | -   | -   | +          | -            | +              | ND            | +      |          |                |             |
| IgG     | IgG1     | Pat TB 7   | 079         | IGHV3-30*01 | IGHJ5*02 | 13  | PHDIVITNPFDL       | kappa  | IGKV1D-16*01 | IGKJ4*01            | 9  | +  | +   | -   | +          | -            | -              | ND            | -      |          |                |             |
| IgG     | IgG1     | Pat TB 7   | 196         | IGHV4-34*01 | IGHJ4*02 | 5   | DVFPLRLYYYQSSGFYNY | kappa  | IGKV3-20*01  | IGKJ2*02            | 9  | +  | +   | +   | ND         | -            | +              | ND            | -      |          |                |             |
| IgG     | IgG1     | Pat TB 7   | 242         | IGHV3-74*01 | IGHJ4*02 | 8   | SVGSGAWRHYFDY      | lambda | IGLV1-40*01  | IGLJ3*02            | 12 | +  | -   | -   | +          | ND           | -              | ND            | +      |          |                |             |
| IgG     | IgG1     | Pat TB 7   | 349         | IGHV4-59*08 | IGHJ4*02 | 21  | LFYYDGSSYDPGIDY    | lambda | IGLV7-43*01  | IGLJ3*02            | 9  | +  | -   | -   | -          | -            | -              | ND            | +      |          |                |             |
| IgG     | IgG1     | Pat TB24   | 023         | IGHV3-7*01  | IGHJ4*02 | 16  | DPIRSDGHNYDY       | kappa  | IGKV1-12*01  | IGKJ5*01            | 19 | -  | +   | -   | -          | -            | ND             | ND            | -      |          |                |             |
| IgG     | IgG1     | Pat TB24   | 196         | IGHV3-30*10 | IGHJ4*02 | 32  | EEWVVPNYFDY        | kappa  | IGKV1-39*01  | IGKJ2*02            | 19 | +  | -   | -   | +          | -            | -              | ND            | +      |          |                |             |
| IgG     | IgG1     | Pat TB33   | 052         | IGHV3-21*01 | IGHJ3*01 | 30  | HILGVPGAFHV        | kappa  | IGKV1-NL1*01 | IGKJ2*01            | 15 | +  | +   | -   | -          | ND           | -              | ND            | -      |          |                |             |
| IgG     | IgG2     | Pat TB 7   | 317         | IGHV3-33*03 | IGHJ4*02 | 12  | DYGTGDLAVAGHLDY    | lambda | IGLV1-40*01  | IGLJ3*02            | 11 | +  | -   | -   | +          | -            | +              | ND            | -      |          |                |             |
| IgG     | IgG3     | Pat TB 7   | 070         | IGHV4-34*01 | IGHJ6*03 | 19  | GSVTDSYYYYIDV      | kappa  | IGKV1-6*01   | IGKJ1*01            | 9  | +  | -   | -   | +          | ND           | -              | ND            | -      |          |                |             |
| IgG     | IgG3     | Pat TB 7   | 153         | IGHV3-66*02 | IGHJ6*02 | 56  | SSLCGDCYSPVYFHYLDI | lambda | IGLV2-23*02  | IGLJ1*01            | 11 | +  | +   | +   | ND         | ND           | +              | ND            | -      |          |                |             |

ND, not determined; SHM, somatic hypermutations; VH, variable segment heavy chain; JH, joining segment heavy chain; VL, variable segment light chain; JL, joining segment light chain.

**Appendix Table S5: Statistical analysis**

|                                                                                                          | <b>exact p-value</b> | <b>category</b> |
|----------------------------------------------------------------------------------------------------------|----------------------|-----------------|
| <b>Figure 1 A</b> , Mann-Whitney, unpaired, non normal distribution                                      |                      |                 |
| MTB lysate, TB versus HD                                                                                 | p < 0.0001           | ****            |
| Cell membrane, TB versus HD                                                                              | p < 0.0001           | ****            |
| CFP, TB versus HD                                                                                        | p=0.0066             | **              |
| <b>Figure 1 B</b> , Mann-Whitney, unpaired, non normal distribution                                      |                      |                 |
| MTB lysate, TB versus HD                                                                                 | p=0.0006             | ***             |
| Cell membrane, TB versus HD                                                                              | p=0.0020             | **              |
| CFP; TB versus HD                                                                                        | p=0.1186             | ns              |
| <b>Figure 2 E</b> , Mann-Whitney, unpaired, non normal distribution                                      | p < 0.0001           | ****            |
| <b>Figure 5 B</b> , Mann-Whitney, unpaired, non normal distribution                                      |                      |                 |
| IgA vs IgG                                                                                               | p<0.0001             | ****            |
| <b>Figure 5 D</b> , Mann-Whitney, unpaired, non normal distribution                                      |                      |                 |
| IgA vs IgG                                                                                               | P=0.0061             | **              |
| <b>Figure 5 E</b> , t-test, non-paired, normal distribution as tested by D'Agostino-Pearson omnibus test |                      |                 |
| TB24PB054, IgA vs IgG                                                                                    | P=0.0063             | **              |
| TB24PB037, IgA vs IgG                                                                                    | P=0.0079             | **              |
| TB33PB129, IgA vs IgG                                                                                    | P=0.0014             | **              |
| TB24PB218, IgA vs IgG                                                                                    | P=0.0170             | *               |
| HCW1HBMem095, IgA vs IgG                                                                                 | P=0.0017             | **              |
| <b>Figure 6 A</b> , Mann-Whitney, unpaired, non normal distribution                                      |                      |                 |
| no mAb vs IgA TB24PB037                                                                                  | P=0.0005             | ***             |
| no mAb vs IgG TB24PB037                                                                                  | P= 0.9119            | ns              |
| <b>Figure 7 B</b> , Mann-Whitney, unpaired, non normal distribution                                      |                      |                 |
| IgA vs IgG                                                                                               | p<0.0001             | ****            |

## Appendix Figure S1 A and B

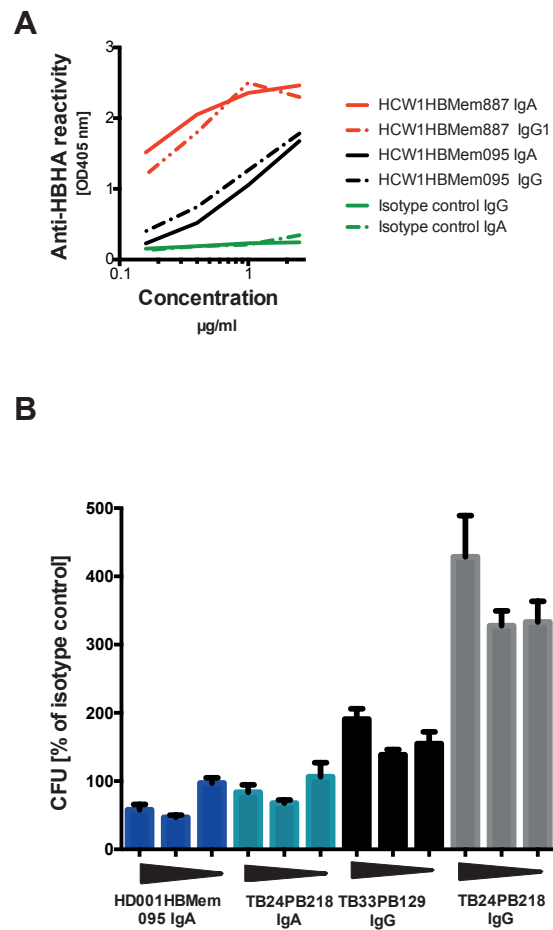

### Appendix Figure S1. Antigen-reactivity and concentration-dependent effect of monoclonal IgG and IgA antibodies on MTB infection of human lung epithelial cells.

(A) Representative HBHA ELISA data from two independent experiments for the indicated IgA and IgG antibodies and respective isotype controls. (B) Relative bacterial counts (CFU) compared to the medium control (100%) in human lung epithelial A549 cells 1 h after infection with MTB, pre-incubated with the indicated recombinant MTB-reactive antibodies at different concentration of 100  $\mu\text{g/ml}$ , 10  $\mu\text{g/ml}$  and 1  $\mu\text{g/ml}$  (from left to right). Pooled data from one or two independent experiments with two or three technical replicates each. Mean and SD are indicated.
